# Supplementary material
Source: publisher site journal article supplement (https://www.spandidos-publications.com/8483/downloadSupplementary)
Supplement: Supplementary file 1 [file downloadSupplementary]

Table SI. Comparison of metabolite changes ( $\Delta$ ) between baseline (fraction 0) and end of radiotherapy (fraction 38) between AE(+) and AE(-) groups, with and without exclusion of the UDCA-treated patient (patient 7).

| Metabolite     | AE(+) (n=7) versus AE(-) (n=4)                  |                                                 |         | AE(+) (n=6) versus AE(-) (n=4) (excluding the UDCA-treated patient) |                                                 |         |
|----------------|-------------------------------------------------|-------------------------------------------------|---------|---------------------------------------------------------------------|-------------------------------------------------|---------|
|                | AE(+) $\Delta$ [median (range); $\mu\text{M}$ ] | AE(-) $\Delta$ [median (range); $\mu\text{M}$ ] | P-value | AE(+) $\Delta$ [median (range); $\mu\text{M}$ ]                     | AE(-) $\Delta$ [median (range); $\mu\text{M}$ ] | P-value |
| CE (20:4)      | 0.001 (-0.030 to 0.073)                         | -0.0230 (-0.0610 to 0.0250)                     | 0.2303  | 0.0075 (-0.0300 to 0.0730)                                          | -0.0230 (-0.0610 to 0.0250)                     | 0.2571  |
| TDCA           | 0.001 (-0.030 to 0.073)                         | -0.0055 (-0.006 to -0.0010)                     | 0.5714  | 0.0030 (-0.0080 to 0.0110)                                          | -0.0055 (-0.0060 to -0.0010)                    | 0.3697  |
| TG (18:0_32:2) | 0.001 (-0.007 to 0.004)                         | -0.0025 (-0.0180 to 0.0130)                     | 0.8285  | 0.0010 (-0.0070 to 0.0040)                                          | -0.0025 (-0.0180 to 0.0130)                     | 0.7545  |
| TG (18:3_34:1) | 0.0001 (-0.008 to 0.007)                        | 0.0035 (0.000 to 0.0160)                        | 0.3809  | 0.0010 (-0.0020 to 0.0070)                                          | 0.0035 (0.0000 to 0.0160)                       | 0.2485  |
| PC aa C42:2    | -0.001 (-0.021 to 0.010)                        | 0.0105 (0.0040 to 0.0130)                       | 0.0666  | -0.0015 (-0.0210 to 0.0100)                                         | 0.0105 (0.0040 to 0.0130)                       | 0.0667  |
| TG (16:0_38:1) | -0.015 (-0.0300 to 0.0100)                      | 0.0185 (0.0100 to 0.0250)                       | 0.0190  | -0.0055 (-0.0300 to 0.0100)                                         | 0.0185 (0.0100 to 0.0250)                       | 0.0121  |
| PC ae C42:1    | -0.004 (-0.016 to 0.007)                        | -0.012 (-0.104 to 0.037)                        | 0.4476  | -0.0040 (-0.0160 to 0.0070)                                         | 0.0025 (-0.0130 to 0.0040)                      | 0.4363  |
| FA (20:2)      | -0.012 (-0.104 to 0.037)                        | 0.019 (-0.010 to 0.096)                         | 0.1142  | -0.0180 (-0.0100 to 0.0960)                                         | 0.0190 (-0.0100 to 0.0960)                      | 0.1636  |
| DG (18:1_18:1) | -0.013 (-0.027 to 0.009)                        | 0.0245 (-0.017 to 0.038)                        | 0.0066  | -0.0185 (-0.0270 to 0.0090)                                         | 0.0245 (-0.0170 to 0.0380)                      | 0.0727  |

Changes in metabolite levels ( $\Delta$ ) were calculated for each patient as the difference between metabolite levels at the end of radiotherapy (fraction 38) and baseline (fraction 0). These  $\Delta$  values were compared between the AE(+) and AE(-) groups using the Mann-Whitney U test. Only nominal P-values are shown. Sensitivity analysis was performed by excluding the UDCA-treated patient (patient no. 7). AE, adverse event; DG, diglyceride; FA, fatty acid; PC, phosphatidylcholine; TDCA, taurodeoxycholic acid; TG, triglyceride; UDCA, ursodeoxycholic acid.

Table SII. Correlation-based sensitivity analysis of patient-level Spearman's rank correlation coefficients ( $\rho$ ) with and without exclusion of the UDCA-treated patient (patient 7).

| Metabolite     | AE(+) (n=7) versus AE(-) (n=4) |         | AE(+) (n=6) versus AE(-) (n=4) (excluding the UDCA-treated patient) |         |
|----------------|--------------------------------|---------|---------------------------------------------------------------------|---------|
|                | P-value                        | Q-value | P-value                                                             | Q-value |
| CE (20:4)      | 0.07                           | 0.81    | 0.07                                                                | 0.79    |
| TDCA           | 0.01                           | 0.49    | 0.01                                                                | 0.64    |
| TG (18:0_32:2) | 0.02                           | 0.65    | 0.02                                                                | 0.74    |
| TG (18:3_34:1) | 0.01                           | 0.49    | 0.01                                                                | 0.64    |
| PC aa C42:2    | 0.01                           | 0.49    | 0.01                                                                | 0.64    |
| TG (16:0_38:1) | 0.01                           | 0.49    | 0.01                                                                | 0.64    |
| PC ae C42:1    | 0.01                           | 0.51    | 0.02                                                                | 0.64    |
| FA (20:2)      | 0.05                           | 0.81    | 0.04                                                                | 0.80    |
| DG (18:1_18:1) | 0.23                           | 0.93    | 0.26                                                                | 0.95    |

Correlation-based comparisons were performed using patient-level Spearman's rank correlation coefficients ( $\rho$ ). Group differences in  $\rho$  were assessed using the Mann-Whitney U test. P-values were adjusted for multiple testing using the Benjamini-Hochberg false discovery rate procedure. Sensitivity analysis was performed by excluding the UDCA-treated patient (patient no. 7). AE, adverse event; DG, diglyceride; FA, fatty acid; PC, phosphatidylcholine; TDCA, taurodeoxycholic acid; TG, triglyceride; UDCA, ursodeoxycholic acid.

Table SIII. Enzymes and genes associated with the phosphatidylcholine-fatty acid interaction network identified by OmicsNet analysis.

| <b>A. Triglyceride-associated enzymes and genes</b>      |                                                        |                |
|----------------------------------------------------------|--------------------------------------------------------|----------------|
| <b>Gene/enzyme</b>                                       | <b>Name</b>                                            | <b>KEGG KO</b> |
| LIPF                                                     | Gastric triacylglycerol lipase                         | K14452         |
| PNLIPRP1                                                 | Pancreatic lipase-related protein 1                    | K14074         |
| PNLIPRP2                                                 | Pancreatic lipase-related protein 2                    | K14075         |
| PNLIPRP3                                                 | Pancreatic lipase-related protein 3                    | K14076         |
| PNLIP                                                    | Pancreatic triacylglycerol lipase                      | K14073         |
| AADAC                                                    | Arylacetamide deacetylase                              | K13616         |
| PNPLA2                                                   | Patatin-like phospholipase domain-containing protein 2 | K16816         |
| PNPLA3                                                   | Patatin-like phospholipase domain-containing protein 3 | K13534         |
| DGAT1                                                    | Diacylglycerol O-acyltransferase 1                     | K11155         |
| DGAT2                                                    | Diacylglycerol O-acyltransferase 2                     | K11156         |
| LIPE                                                     | Hormone-sensitive lipase                               | K07188         |
| LPL                                                      | Lipoprotein lipase                                     | K01059         |
| LIPG                                                     | Endothelial lipase                                     | K22284         |
| LIPC                                                     | Hepatic triacylglycerol lipase                         | K22283         |
| MOGAT3                                                   | 2-acylglycerol O-acyltransferase 3                     | K14456         |
| <b>B. Cholesterol ester-associated enzymes and genes</b> |                                                        |                |
| <b>Gene/enzyme</b>                                       | <b>Name</b>                                            | <b>KEGG ID</b> |
| SOAT1                                                    | Sterol O-acyltransferase 1                             | K00637         |
| SOAT2                                                    | Sterol O-acyltransferase 2                             | K00637         |

LIPA

Lysosomal acid lipase/cholesteryl ester hydrolase

K01052

---

**C. Triacylglycerol-cholesteryl ester interaction enzymes and genes**

---

**Gene/enzyme**

**Name**

**KEGG ID**

CEL

Bile salt-activated lipase

K12298

---

CE, cholesteryl ester; KEGG, Kyoto Encyclopedia of Genes and Genomes; KO, KEGG Orthology.

Table SIV. Enzymes and genes associated with the fatty acid-diglyceride/triglyceride interaction network identified by OmicsNet analysis.

| <b>Gene/enzyme</b> | <b>Name</b>                                            | <b>KEGG KO</b> |
|--------------------|--------------------------------------------------------|----------------|
| PLA2G2E            | Phospholipase A2 group IIE                             | K01047         |
| PLA2G16            | HRAS-like suppressor 3                                 | K16817         |
| PLB1               | Phospholipase B1                                       | K14621         |
| PLA2G4B            | Cytosolic phospholipase A2 $\beta$                     | K16342         |
| PLA2G4D            | Cytosolic phospholipase A3 $\delta$                    | K16342         |
| PLA2G2F            | Phospholipase A2 group IIF                             | K01047         |
| PLA2G6             | 85/88 kDa calcium-independent phospholipase A2         | K16343         |
| PLA2G3             | Phospholipase A2 group3                                | K01047         |
| CLC                | Eosinophil lysophospholipase                           | K13334         |
| PNPLA7             | Patatin-like phospholipase domain-containing protein 7 | K14676         |
| PLA2G12A           | Phospholipase A2 group XIIA                            | K01047         |
| PLAAT2             | Phospholipase A and acyltransferase 2                  | K16817         |
| LYPLA1             | Acyl-protein thioesterase 1                            | K06128         |
| PLA2G4A            | Cytosolic phospholipase A2                             | K16342         |
| LYPLA2             | Acyl-protein thioesterase 2                            | K06130         |
| PLA2G10            | Phospholipase A2 group 10                              | K01047         |
| ASPG               | 60 kDa lysophospholipase                               | K13278         |
| PLA2G4C            | Cytosolic phospholipase A2 $\gamma$                    | K16342         |
| PLA2G4F            | Cytosolic phospholipase A2 $\zeta$                     | K16342         |
| PLA2G2C            | Phospholipase A2 putative inactive group IIC           | K01047         |
| PLA2G15            | Phospholipase A2 group XV                              | K06129         |
| PNPLA6             | Neuropathy target esterase                             | K14676         |

|                  |                                          |        |
|------------------|------------------------------------------|--------|
| PLA2G2A          | Phospholipase A2                         | K01047 |
| (JMJD7-)-PLA2G4B | Cytosolic phospholipase A2 $\beta$       | K16342 |
| PLA2G2D          | Phospholipase A2 group IID               | K01047 |
| PLA2G1B          | Phospholipase A2                         | K01047 |
| PLA2G5           | Phospholipase A2 group V                 | K01047 |
| PLA2G12B         | Phospholipase A2-like protein group XIIB | K01047 |

---

Multiple genes may share the same KEGG KO identifier because KO represents a functional orthology group. FA, fatty acid; KEGG, Kyoto Encyclopedia of Genes and Genomes; KO, KEGG Orthology; PC, phosphatidylcholine.

Table SV. Enzymes associated with the hypothesized triglyceride-fatty acid lipolysis pathway identified in the network analysis.

| <b>Gene/enzyme</b> | <b>Name</b>                                            | <b>KEGG KO</b> |
|--------------------|--------------------------------------------------------|----------------|
| LIPH               | Lipase member H                                        | K19404         |
| PNPLA2             | Patatin-like phospholipase domain-containing protein 2 | K16816         |
| PNLIPRP3           | Pancreatic lipase-related protein 3                    | K14076         |
| LIPG               | Endothelial lipase                                     | K22284         |
| AADAC              | Arylacetamide deacetylase                              | K13616         |
| CEL                | Bile salt-activated lipase                             | K12298         |
| LIPC               | Hepatic triacylglycerol lipase                         | K22283         |
| PNLIPRP2           | Pancreatic lipase-related protein 2                    | K14075         |
| PNPLA3             | Patatin-like phospholipase domain-containing protein 3 | K13534         |
| PNLIP              | Pancreatic triacylglycerol lipase                      | K14073         |
| PNLIPRP1           | Inactive pancreatic lipase-related protein 1           | K14074         |

KEGG, Kyoto Encyclopedia of Genes and Genomes; KO, KEGG Orthology.
